# Supplementary material for: Social Isolation and Loneliness among Near-Centenarians and Centenarians: Results from the Fordham Centenarian Study
Source: MDPI journal article supplement (doi:10.3390/ijerph19105940), 2022-05-13
Supplement: s1 [file s1]

**Table S1.** Comparison between included and excluded participants by individual characteristics

|                                 | Included |                       | Excluded |                       |          |
|---------------------------------|----------|-----------------------|----------|-----------------------|----------|
| Variables                       | <i>n</i> | <i>Mean (SD) or %</i> | <i>n</i> | <i>Mean (SD) or %</i> | <i>p</i> |
| Demographic variables           |          |                       |          |                       |          |
| Gender                          |          |                       |          |                       |          |
| Male                            | 21       | 22.3                  | 5        | 20.0                  | 0.801    |
| Female                          | 73       | 77.7                  | 20       | 80.0                  |          |
| Ethnicity                       |          |                       |          |                       |          |
| White                           | 75       | 80.6                  | 20       | 80.0                  | 0.942    |
| Black                           | 18       | 19.4                  | 5        | 20.0                  |          |
| Age                             | 94       | 99.6 (2.4)            | 25       | 99.3 (2.7)            | 0.913    |
| Socio-economic variables        |          |                       |          |                       |          |
| Education                       |          |                       |          |                       |          |
| Less than diploma               | 48       | 51.6                  | 12       | 48.0                  | 0.785    |
| Diploma or more                 | 45       | 48.4                  | 13       | 52.0                  |          |
| Difficulties living on income   |          |                       |          |                       |          |
| No                              | 52       | 59.8                  | 11       | 57.9                  | 0.880    |
| Yes                             | 35       | 40.2                  | 8        | 42.1                  |          |
| Difficulties paying medications |          |                       |          |                       |          |
| No                              | 69       | 76.7                  | 14       | 73.7                  | 0.782    |
| Yes                             | 21       | 23.3                  | 5        | 26.3                  |          |
| Social variables                |          |                       |          |                       |          |
| Marital status                  |          |                       |          |                       |          |
| Never married                   | 9        | 9.6                   | 2        | 8.0                   | 0.291    |
| Married                         | 5        | 5.3                   | 3        | 12.0                  |          |
| Divorced                        | 6        | 6.4                   | 3        | 12.0                  |          |
| Separate                        | 1        | 1.1                   | 1        | 4.0                   |          |
| Widowed                         | 73       | 77.7                  | 16       | 64.0                  |          |
| Living condition                |          |                       |          |                       |          |
| At home alone                   | 49       | 52.1                  | 15       | 60.0                  | 0.625    |
| At home with others             | 25       | 26.6                  | 7        | 28.0                  |          |
| Nursing homes                   | 20       | 21.3                  | 3        | 12.0                  |          |
| Health variables                |          |                       |          |                       |          |
| Number of chronic diseases      | 94       | 4.9 (2.3)             | 22       | 4.8 (2.5)             | 0.857    |
| IADLs score                     | 87       | 8.9 (4.0)             | 15       | 8.8 (1.1)             | 0.924    |
| Restrictions due to health      |          |                       |          |                       |          |
| Never/Seldom                    | 32       | 34.4                  | 9        | 37.5                  | 0.878    |
| Sometimes                       | 24       | 25.8                  | 5        | 20.8                  |          |
| Often/Always                    | 37       | 39.8                  | 10       | 41.7                  |          |
| Mini-mental state examination   | 94       | 16.9 (3.3)            | 25       | 13.4 (5.2)            | 0.006    |
| Psychological variables         |          |                       |          |                       |          |
| Life satisfaction score         | 92       | 2.1 (1.2)             | 20       | 1.8 (1.2)             | 0.269    |
| Geriatric Depression Scale      | 93       | 4.0 (3.5)             | 14       | 4.6 (3.1)             | 0.350    |

**Table S2.** Variance Inflation Factors (VIF) and Tolerance Criterion by domains

|                                               | VIF  | Tolerance |
|-----------------------------------------------|------|-----------|
| <i>Demographics domain</i>                    |      |           |
| Age                                           | 1.02 | 0.976     |
| Gender                                        | 1.02 | 0.977     |
| Ethnicity                                     | 1.01 | 0.995     |
| <i>Socio-economics domain</i>                 |      |           |
| Education                                     | 1.03 | 0.966     |
| Difficulties with income                      | 1.35 | 0.742     |
| Difficulties paying meds                      | 1.07 | 0.728     |
| <i>Social domain</i>                          |      |           |
| Widowhood                                     | 1.36 | 0.734     |
| Living children                               | 1.07 | 0.933     |
| Having grandchildren                          | 1.52 | 0.656     |
| Children living close                         | 1.50 | 0.665     |
| Living condition                              | 1.12 | 0.891     |
| Meetings previous week                        | 1.33 | 0.754     |
| Satisfaction with family and friends meetings | 1.36 | 0.734     |
| <i>Health domain</i>                          |      |           |
| Chronic diseases                              | 1.20 | 0.831     |
| Subjective health                             | 1.25 | 0.801     |
| IADLs score                                   | 1.21 | 0.824     |
| Restrictions due to health                    | 1.57 | 0.638     |
| Pain                                          | 1.58 | 0.639     |
| Fatigue                                       | 1.23 | 0.814     |
| <i>Care resources domain</i>                  |      |           |
| Number of caregivers                          | 1.63 | 0.614     |
| Professional help                             | 1.79 | 0.559     |
| Informal help                                 | 1.80 | 0.555     |
| <i>Psychological domain</i>                   |      |           |
| Life satisfaction                             | 1.26 | 0.793     |
| Geriatric Depression Scale                    | 1.33 | 0.754     |
| Extraversion                                  | 1.33 | 0.752     |
| Agreeableness                                 | 1.07 | 0.937     |
| Conscientiousness                             | 1.09 | 0.915     |
| Openness                                      | 1.07 | 0.935     |
| Neuroticism                                   | 1.30 | 0.772     |

**Table S3.** Domain-specific Multinomial Logistic Regression Domains: Average Marginal Effects with 90% Confidence Intervals. \*

| Domains and specific correlates     | Neither Lonely<br>Nor Isolated |        |       | Only but<br>not Isolated |              |              | Isolated but<br>not Lonely |        |       | Lonely &<br>Isolated |               |               |
|-------------------------------------|--------------------------------|--------|-------|--------------------------|--------------|--------------|----------------------------|--------|-------|----------------------|---------------|---------------|
|                                     | AMEs                           | 90% CI |       | AMEs                     | 90% CI       |              | AMEs                       | 90% CI |       | AMEs                 | 90% CI        |               |
|                                     |                                | LL     | UL    |                          | LL           | UL           |                            | LL     | UL    |                      | LL            | UL            |
| Demographics domain                 |                                |        |       |                          |              |              |                            |        |       |                      |               |               |
| <i>Age</i>                          | -0.006                         | -0.039 | 0.027 | -0.009                   | -0.038       | 0.020        | -0.008                     | -0.037 | 0.021 | 0.023                | -0.010        | 0.056         |
| <i>Gender</i>                       |                                |        |       |                          |              |              |                            |        |       |                      |               |               |
| Male (ref.)                         |                                |        |       |                          |              |              |                            |        |       |                      |               |               |
| Female                              | -0.095                         | -0.279 | 0.088 | -0.013                   | -0.178       | 0.152        | -0.015                     | -0.185 | 0.156 | 0.123                | -0.084        | 0.330         |
| <i>Ethnicity</i>                    |                                |        |       |                          |              |              |                            |        |       |                      |               |               |
| White (ref.)                        |                                |        |       |                          |              |              |                            |        |       |                      |               |               |
| Black                               | 0.063                          | -0.142 | 0.269 | -0.033                   | -0.199       | 0.133        | 0.093                      | -0.099 | 0.285 | -0.124               | -0.300        | 0.053         |
| Socio-economics domain <sup>a</sup> |                                |        |       |                          |              |              |                            |        |       |                      |               |               |
| <i>Education</i>                    |                                |        |       |                          |              |              |                            |        |       |                      |               |               |
| Less than highschool diploma (ref.) |                                |        |       |                          |              |              |                            |        |       |                      |               |               |
| Highschool diploma or more          | 0.123                          | -0.044 | 0.290 | <b>0.175</b>             | <b>0.035</b> | <b>0.315</b> | 0.013                      | -0.136 | 0.163 | <b>-0.311</b>        | <b>-0.468</b> | <b>-0.155</b> |
| Difficulties with income            |                                |        |       |                          |              |              |                            |        |       |                      |               |               |
| No (ref.)                           |                                |        |       |                          |              |              |                            |        |       |                      |               |               |
| Yes                                 | -0.039                         | -0.229 | 0.150 | 0.004                    | -0.154       | 0.162        | 0.157                      | -0.017 | 0.332 | -0.122               | -0.299        | 0.055         |
| Difficulties paying meds            |                                |        |       |                          |              |              |                            |        |       |                      |               |               |
| No (ref.)                           |                                |        |       |                          |              |              |                            |        |       |                      |               |               |
| Yes                                 | 0.126                          | -0.126 | 0.377 | -0.026                   | -0.218       | 0.165        | -0.146                     | -0.306 | 0.014 | 0.046                | -0.179        | 0.271         |
| Social domain <sup>a</sup>          |                                |        |       |                          |              |              |                            |        |       |                      |               |               |
| <i>Widowhood</i>                    |                                |        |       |                          |              |              |                            |        |       |                      |               |               |
| No (ref.)                           |                                |        |       |                          |              |              |                            |        |       |                      |               |               |
| Yes, for less than 10 years         | 0.029                          | -0.245 | 0.303 | 0.207                    | -0.047       | 0.461        | -0.211                     | -0.455 | 0.033 | -0.025               | -0.297        | 0.247         |
| Yes, for at least 10 years          | 0.060                          | -0.160 | 0.279 | 0.059                    | -0.091       | 0.209        | -0.101                     | -0.339 | 0.137 | -0.017               | -0.237        | 0.203         |
| <i>Living children</i>              |                                |        |       |                          |              |              |                            |        |       |                      |               |               |
| Yes (ref.)                          |                                |        |       |                          |              |              |                            |        |       |                      |               |               |
| No                                  | -0.047                         | -0.288 | 0.193 | 0.030                    | -0.167       | 0.227        | -0.113                     | -0.340 | 0.115 | 0.130                | -0.082        | 0.341         |

| Domains and specific correlates                      | Neither Lonely<br>Nor Isolated |              |              | Only but<br>not Isolated |               |               | Isolated but<br>not Lonely |              |              | Lonely &<br>Isolated |               |               |
|------------------------------------------------------|--------------------------------|--------------|--------------|--------------------------|---------------|---------------|----------------------------|--------------|--------------|----------------------|---------------|---------------|
|                                                      | AMEs                           | 90% CI       |              | AMEs                     | 90% CI        |               | AMEs                       | 90% CI       |              | AMEs                 | 90% CI        |               |
|                                                      |                                | LL           | UL           |                          | LL            | UL            |                            | LL           | UL           |                      | LL            | UL            |
| <i>Having grandchildren</i>                          |                                |              |              |                          |               |               |                            |              |              |                      |               |               |
| No (ref.)                                            |                                |              |              |                          |               |               |                            |              |              |                      |               |               |
| Yes                                                  | 0.240                          | 0.058        | 0.423        | 0.031                    | -0.118        | 0.180         | -0.141                     | -0.332       | 0.050        | -0.130               | -0.337        | 0.076         |
| <i>Children living close</i>                         |                                |              |              |                          |               |               |                            |              |              |                      |               |               |
| None (ref.)                                          |                                |              |              |                          |               |               |                            |              |              |                      |               |               |
| One                                                  | -0.180                         | -0.379       | 0.019        | -0.069                   | -0.263        | 0.126         | <b>0.264</b>               | <b>0.039</b> | <b>0.480</b> | -0.015               | -0.217        | 0.186         |
| More than one                                        | -0.186                         | -0.377       | 0.006        | -0.154                   | -0.328        | 0.020         | 0.051                      | -0.132       | 0.233        | <b>0.288</b>         | <b>0.052</b>  | <b>0.525</b>  |
| <i>Living condition</i>                              |                                |              |              |                          |               |               |                            |              |              |                      |               |               |
| At home alone (ref.)                                 |                                |              |              |                          |               |               |                            |              |              |                      |               |               |
| At home with others                                  | 0.069                          | -0.130       | 0.268        | -0.017                   | -0.193        | 0.159         | -0.151                     | -0.304       | 0.003        | 0.098                | -0.088        | 0.284         |
| Nursing home                                         | -0.120                         | -0.317       | 0.078        | -0.024                   | -0.190        | 0.142         | -0.005                     | -0.224       | 0.214        | 0.148                | -0.059        | 0.356         |
| <i>Meetings previous week</i>                        |                                |              |              |                          |               |               |                            |              |              |                      |               |               |
| No more than one (ref.)                              |                                |              |              |                          |               |               |                            |              |              |                      |               |               |
| More than one                                        | <b>0.246</b>                   | <b>0.071</b> | <b>0.422</b> | 0.109                    | -0.048        | 0.266         | -0.144                     | -0.313       | 0.026        | <b>-0.212</b>        | <b>-0.399</b> | <b>-0.025</b> |
| <i>Satisfaction with family and friends meetings</i> |                                |              |              |                          |               |               |                            |              |              |                      |               |               |
| No (ref.)                                            |                                |              |              |                          |               |               |                            |              |              |                      |               |               |
| Yes                                                  | <b>0.191</b>                   | <b>0.044</b> | <b>0.337</b> | -0.112                   | -0.260        | 0.036         | <b>0.181</b>               | <b>0.042</b> | <b>0.321</b> | <b>-0.260</b>        | <b>-0.422</b> | <b>-0.099</b> |
| Health domain <sup>a</sup>                           |                                |              |              |                          |               |               |                            |              |              |                      |               |               |
| <i>Chronic diseases</i>                              |                                |              |              |                          |               |               |                            |              |              |                      |               |               |
| 0 to 3 (ref.)                                        |                                |              |              |                          |               |               |                            |              |              |                      |               |               |
| 4 or 5                                               | 0.039                          | -0.149       | 0.228        | 0.052                    | -0.137        | 0.241         | 0.067                      | -0.122       | 0.257        | -0.158               | -0.346        | 0.029         |
| 6 or more                                            | 0.048                          | -0.158       | 0.254        | -0.055                   | -0.234        | 0.124         | -0.009                     | -0.204       | 0.185        | 0.016                | -0.202        | 0.233         |
| <i>Subjective health</i>                             |                                |              |              |                          |               |               |                            |              |              |                      |               |               |
| Poor (ref.)                                          |                                |              |              |                          |               |               |                            |              |              |                      |               |               |
| Good                                                 | -0.033                         | -0.236       | 0.171        | -0.205                   | -0.427        | 0.017         | <b>0.259</b>               | <b>0.056</b> | <b>0.462</b> | -0.021               | -0.200        | 0.157         |
| Very good/Excellent                                  | 0.162                          | -0.069       | 0.392        | <b>-0.269</b>            | <b>-0.478</b> | <b>-0.059</b> | 0.022                      | -0.130       | 0.174        | 0.085                | -0.098        | 0.268         |
| <i>IADLs score</i>                                   |                                |              |              |                          |               |               |                            |              |              |                      |               |               |
| 1st tertile (ref.)                                   |                                |              |              |                          |               |               |                            |              |              |                      |               |               |
| 2nd tertile                                          | <b>0.285</b>                   | <b>0.109</b> | <b>0.460</b> | 0.031                    | -0.152        | 0.213         | -0.091                     | -0.275       | 0.092        | <b>-0.224</b>        | <b>-0.439</b> | <b>-0.009</b> |

| Domains and specific correlates    | Neither Lonely<br>Nor Isolated |               |               | Only but<br>not Isolated |        |       | Isolated but<br>not Lonely |              |              | Lonely &<br>Isolated |               |               |
|------------------------------------|--------------------------------|---------------|---------------|--------------------------|--------|-------|----------------------------|--------------|--------------|----------------------|---------------|---------------|
|                                    | AMEs                           | 90% CI        |               | AMEs                     | 90% CI |       | AMEs                       | 90% CI       |              | AMEs                 | 90% CI        |               |
|                                    |                                | LL            | UL            |                          | LL     | UL    |                            | LL           | UL           |                      | LL            | UL            |
| 3rd tertile                        | <b>0.383</b>                   | <b>0.179</b>  | <b>0.588</b>  | -0.059                   | -0.253 | 0.136 | 0.015                      | -0.205       | 0.235        | <b>-0.340</b>        | <b>-0.547</b> | <b>-0.132</b> |
| <i>Restrictions due to health</i>  |                                |               |               |                          |        |       |                            |              |              |                      |               |               |
| <i>Never, seldom (ref.)</i>        |                                |               |               |                          |        |       |                            |              |              |                      |               |               |
| Sometimes                          | 0.078                          | -0.165        | 0.320         | -0.082                   | -0.275 | 0.110 | 0.031                      | -0.168       | 0.230        | -0.026               | -0.220        | 0.167         |
| Often, always                      | -0.229                         | -0.422        | -0.035        | 0.000                    | -0.204 | 0.205 | 0.156                      | -0.039       | 0.351        | 0.072                | -0.119        | 0.264         |
| <i>Pain</i>                        |                                |               |               |                          |        |       |                            |              |              |                      |               |               |
| 1st tertile (ref.)                 |                                |               |               |                          |        |       |                            |              |              |                      |               |               |
| 2nd tertile                        | 0.132                          | -0.068        | 0.331         | -0.048                   | -0.246 | 0.150 | -0.014                     | -0.231       | 0.203        | -0.070               | -0.255        | 0.116         |
| 3rd tertile                        | 0.091                          | -0.105        | 0.288         | -0.153                   | -0.328 | 0.022 | -0.124                     | -0.314       | 0.065        | 0.186                | -0.038        | 0.411         |
| <i>Fatigue</i>                     |                                |               |               |                          |        |       |                            |              |              |                      |               |               |
| 1st tertile (ref.)                 |                                |               |               |                          |        |       |                            |              |              |                      |               |               |
| 2nd tertile                        | -0.174                         | -0.378        | 0.030         | 0.154                    | -0.037 | 0.346 | 0.055                      | -0.093       | 0.203        | -0.035               | -0.214        | 0.143         |
| 3rd tertile                        | <b>-0.276</b>                  | <b>-0.494</b> | <b>-0.059</b> | -0.110                   | -0.263 | 0.044 | <b>0.381</b>               | <b>0.145</b> | <b>0.616</b> | 0.005                | -0.234        | 0.245         |
| Care resources domain <sup>a</sup> |                                |               |               |                          |        |       |                            |              |              |                      |               |               |
| <i>Number of caregivers</i>        |                                |               |               |                          |        |       |                            |              |              |                      |               |               |
| None or 1 (ref.)                   |                                |               |               |                          |        |       |                            |              |              |                      |               |               |
| More than 1                        | <b>-0.246</b>                  | <b>-0.480</b> | <b>-0.013</b> | -0.041                   | -0.230 | 0.147 | -0.043                     | -0.215       | 0.130        | <b>0.330</b>         | <b>0.159</b>  | <b>0.502</b>  |
| <i>Professional help</i>           |                                |               |               |                          |        |       |                            |              |              |                      |               |               |
| No (ref.)                          |                                |               |               |                          |        |       |                            |              |              |                      |               |               |
| Yes                                | 0.089                          | -0.158        | 0.335         | 0.101                    | -0.125 | 0.326 | -0.138                     | -0.327       | 0.051        | -0.051               | -0.281        | 0.179         |
| <i>Informal help</i>               |                                |               |               |                          |        |       |                            |              |              |                      |               |               |
| No (ref.)                          |                                |               |               |                          |        |       |                            |              |              |                      |               |               |
| Yes                                | <b>0.295</b>                   | <b>0.069</b>  | <b>0.522</b>  | 0.055                    | -0.137 | 0.246 | -0.191                     | -0.374       | -0.008       | <b>-0.159</b>        | <b>-0.344</b> | <b>0.026</b>  |
| Psychological domain <sup>a</sup>  |                                |               |               |                          |        |       |                            |              |              |                      |               |               |
| <i>Life satisfaction</i>           |                                |               |               |                          |        |       |                            |              |              |                      |               |               |
| 1st tertile (ref.)                 |                                |               |               |                          |        |       |                            |              |              |                      |               |               |
| 2nd tertile                        | 0.083                          | -0.103        | 0.269         | -0.068                   | -0.249 | 0.114 | -0.068                     | -0.248       | 0.112        | 0.053                | -0.107        | 0.212         |
| 3rd tertile                        | 0.068                          | -0.124        | 0.259         | -0.031                   | -0.235 | 0.173 | -0.018                     | -0.221       | 0.185        | -0.019               | -0.216        | 0.178         |
| <i>Geriatric Depression Scale</i>  |                                |               |               |                          |        |       |                            |              |              |                      |               |               |

| Domains and specific correlates | Neither Lonely<br>Nor Isolated |              |              | Only but<br>not Isolated |        |       | Isolated but<br>not Lonely |               |               | Lonely &<br>Isolated |               |               |
|---------------------------------|--------------------------------|--------------|--------------|--------------------------|--------|-------|----------------------------|---------------|---------------|----------------------|---------------|---------------|
|                                 | AMEs                           | 90% CI       |              | AMEs                     | 90% CI |       | AMEs                       | 90% CI        |               | AMEs                 | 90% CI        |               |
|                                 |                                | LL           | UL           |                          | LL     | UL    |                            | LL            | UL            |                      | LL            | UL            |
| 1st tertile (ref.)              |                                |              |              |                          |        |       |                            |               |               |                      |               |               |
| 2nd tertile                     | -0.058                         | -0.259       | 0.143        | -0.031                   | -0.227 | 0.165 | <b>0.225</b>               | <b>0.043</b>  | <b>0.406</b>  | -0.136               | -0.296        | 0.024         |
| 3rd tertile                     | -0.182                         | -0.387       | 0.024        | -0.159                   | -0.340 | 0.022 | 0.154                      | -0.045        | 0.354         | 0.186                | -0.029        | 0.402         |
| <i>Extraversion</i>             |                                |              |              |                          |        |       |                            |               |               |                      |               |               |
| 1st tertile (ref.)              |                                |              |              |                          |        |       |                            |               |               |                      |               |               |
| 2nd tertile                     | 0.031                          | -0.158       | 0.220        | -0.094                   | -0.292 | 0.104 | -0.067                     | -0.220        | 0.086         | 0.129                | -0.023        | 0.282         |
| 3rd tertile                     | 0.043                          | -0.150       | 0.236        | -0.176                   | -0.375 | 0.024 | 0.041                      | -0.148        | 0.231         | 0.091                | -0.085        | 0.267         |
| <i>Agreeableness</i>            |                                |              |              |                          |        |       |                            |               |               |                      |               |               |
| 1st tertile (ref.)              |                                |              |              |                          |        |       |                            |               |               |                      |               |               |
| 2nd tertile                     | -0.117                         | -0.294       | 0.060        | 0.091                    | -0.101 | 0.282 | <b>0.209</b>               | <b>0.047</b>  | <b>0.370</b>  | <b>-0.182</b>        | <b>-0.354</b> | <b>-0.011</b> |
| 3rd tertile                     | 0.120                          | -0.068       | 0.308        | -0.072                   | -0.230 | 0.085 | 0.029                      | -0.131        | 0.190         | -0.078               | -0.261        | 0.105         |
| <i>Conscientiousness</i>        |                                |              |              |                          |        |       |                            |               |               |                      |               |               |
| 1st tertile (ref.)              |                                |              |              |                          |        |       |                            |               |               |                      |               |               |
| 2nd tertile                     | 0.025                          | -0.211       | 0.260        | 0.125                    | -0.049 | 0.298 | 0.020                      | -0.185        | 0.226         | -0.170               | -0.371        | 0.031         |
| 3rd tertile                     | 0.097                          | -0.143       | 0.336        | 0.117                    | -0.053 | 0.287 | -0.073                     | -0.246        | 0.099         | -0.140               | -0.348        | 0.067         |
| <i>Openness</i>                 |                                |              |              |                          |        |       |                            |               |               |                      |               |               |
| 1st tertile (ref.)              |                                |              |              |                          |        |       |                            |               |               |                      |               |               |
| 2nd tertile                     | <b>0.355</b>                   | <b>0.194</b> | <b>0.516</b> | -0.153                   | -0.344 | 0.038 | 0.006                      | -0.186        | 0.199         | -0.208               | -0.418        | 0.003         |
| 3rd tertile                     | <b>0.325</b>                   | <b>0.117</b> | <b>0.533</b> | 0.092                    | -0.188 | 0.371 | <b>-0.202</b>              | <b>-0.390</b> | <b>-0.014</b> | -0.215               | -0.460        | 0.029         |
| <i>Neuroticism</i>              |                                |              |              |                          |        |       |                            |               |               |                      |               |               |
| 1st tertile (ref.)              |                                |              |              |                          |        |       |                            |               |               |                      |               |               |
| 2nd tertile                     | -0.012                         | -0.179       | 0.154        | 0.042                    | -0.124 | 0.207 | <b>-0.242</b>              | <b>-0.409</b> | <b>-0.074</b> | <b>0.212</b>         | <b>0.072</b>  | <b>0.351</b>  |
| 3rd tertile                     | 0.006                          | -0.186       | 0.199        | 0.004                    | -0.170 | 0.179 | <b>-0.418</b>              | <b>-0.560</b> | <b>-0.275</b> | <b>0.407</b>         | <b>0.233</b>  | <b>0.581</b>  |

Notes. CI = Confidence Interval; LL= Lower limit; UL= Upper limit. AMEs = Average Marginal Effects. (ref.) = reference category.

\* Bold values = AMEs significant at 10% level ( $p < 0.10$ ).

<sup>a</sup> Domain controlled for age, gender, and ethnicity.
